# Supplementary material
Source: publisher figshare collection journal article supplement (https://acs.figshare.com/ndownloader/files/6025326)
Supplement: Supplementary file 1 [file 6025326]

# **Supporting Information**

## **Direct Formation of Silk Nanoparticles for Drug Delivery**

Liying Xiao<sup>a, b</sup>, Guozhong Lu<sup>c</sup>, Qiang Lu<sup>a, b, \*</sup>, David L. Kaplan<sup>d</sup>

<sup>a</sup>Collaborative Innovation Center of Suzhou Nano Science and Technology, Soochow University, Suzhou 215123, People's Republic of China

<sup>b</sup>National Engineering Laboratory for Modern Silk, Soochow University, Suzhou 215123, People's Republic of China

<sup>c</sup>Department of Burns and Plastic Surgery, The Third Affiliated Hospital of Nantong University, Wuxi 214041, People's Republic of China

<sup>d</sup>Department of Biomedical Engineering, Tufts University, Medford, MA 02155, USA

Corresponding author:

\* Qiang Lu, Tel: (+86)-512-67061649; E-mail: [lvqiang78@suda.edu.cn](mailto:lvqiang78@suda.edu.cn)

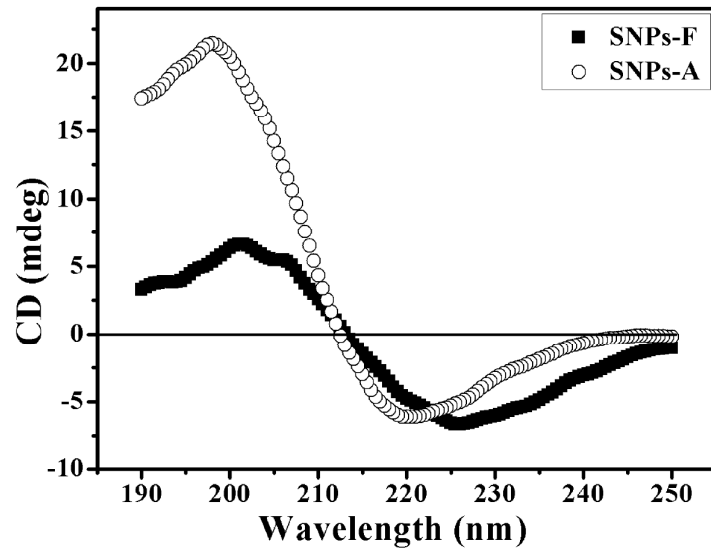

**Figure S1.** CD spectra of SNPs-F and SNPs-A particles.

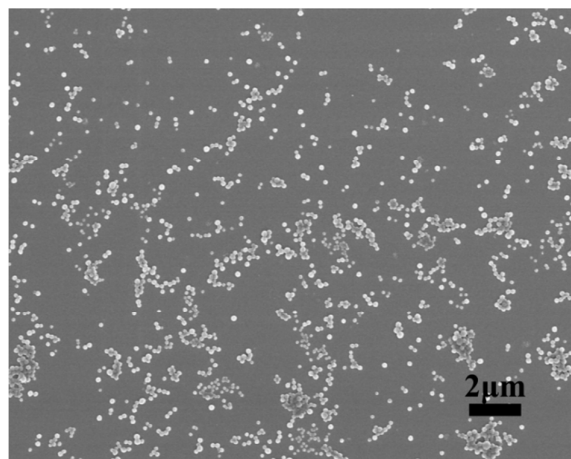

**Figure S2.** SEM image of DOX-loaded SNPs-F particles.

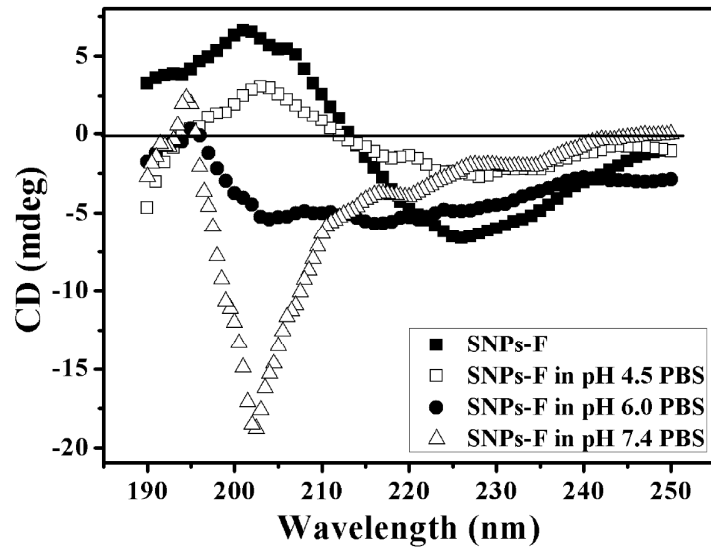

**Figure S3.** CD spectra of SNPs-F particles in pH 4.5, pH 6.0 and pH 7.4 PBS solutions. Before the investigation, the samples were cultured in PBS solution with various pH values at 37 °C for 1 h.
